# Supplementary material for: The C-terminal tail of the bacterial translocation ATPase SecA modulates its activity
Source: eLife. 2019 Jun 27;8:e48385. doi: 10.7554/eLife.48385 (PMC6620043; doi:10.7554/eLife.48385)
Supplement: Supplementary file 1. [file elife-48385-supp1.xlsx]

## Sheet: Sheet1
Tryptic Peptide	Sequence	Mass	Detected in SecA-biotin*	Detected in SecABpa852-biotin*
289-315	EGIMDEGESLYSPANIMLMH HVTAALR	2984.42	X	X
139-166	DAENNRPLFEFLGLTVGINL PGMPAPAK	2980.55	X	X
510-536	GTDIVLGGSWQAEVAALENP TAEQIEK	2825.41	X	X
851-877	LAQMQQLSHQDDDSAAAAAL AAQTGER	2796.31	X	ND
686-709	ATIDAYIPPQSLEEMWDIPG LQER	2771.35	X	X
483-509	FHANEAAIVAQAGYPAAVTI ATNMAGR	2714.36	X	X
361-382	EGVQIQNENQTLASITFQNY FR	2599.27	X	ND
168-188	EAYAADITYGTNNEYGFDYL R	2445.08	ND	ND
387-406	LAGMTGTADTEAFEFSSIYK	2137.99	X	X
203-220	LHYALVDEVDSILIDEAR	2070.06	X	X
252-268	EDSETFQGEGHFSVDEK	1939.81	X	X
664-680	NELLDVSDVSETINSIR	1902.95	X	X
221-237	TPLIISGPAEDSSEMYK	1836.88	X	X
712-726	NDFDLDLPIAEWLDK	1802.87	X	X
610-625	LGMKPGEAIEHPWVTK	1791.93	X	X
545-561	HDAVLEAGGLHIIGTER	1786.93	X	X
57-72	GEVLENLIPEAFAVVR	1754.96	X	X
83-97	HFDVQLLGGMVLNER	1726.88	X	X
109-124	TLTATLPAYLNALTGK	1646.92	X	X
24-37	VVNIINAMEPEMEK	1615.79	X	X
407-420	LDTVVVPTNRPMIR	1609.9	X	X
806-819	ESFSMFAAMLESLK	1589.75	X	X
644-656	QLLEYDDVANDQR	1577.73	X	X
125-138	GVHVVTVNDYLAQR	1569.83	X	X
422-434	DLPDLVYMTEAEK	1522.72	X	X
833-844	MPEEVEELEQQR	1515.69	X	X
330-342	DGEVIIVDEHTGR	1438.71	X	X
765-776	GVMLQTLDSLWK	1389.73	X	X
586-596	FYLSMEDALMR	1374.63	X	X
449-461	GQPVLVGTISIEK	1339.77	X	X
349-360	WSDGLHQAVEAK	1339.65	X	X
739-749	ILAQSIEVYQR	1318.72	X	X
727-736	EPELHEETLR	1251.61	X	X
278-288	GLVLIEELLVK	1224.77	X	X
777-786	EHLAAMDYLR	1217.59	X	X
189-198	DNMAFSPEER	1194.5	X	X
751-760	EEVVGAEMMR	1149.52	X	X
462-471	SELVSNELTK	1118.58	X	X
435-443	IQAIIEDIK	1041.61	X	X
820-828	YEVISTLSK	1038.56	X	X
882-891	NDPCPCGSGK	976.374	X	X
242-248	IIPHLIR	860.56	X	X
271-277	QVNLTER	858.456	TSTD	TSTD
323-329	DVDYIVK	850.444	TSTD	TSTD
38-44	LSDEELK	832.418	TSTD	TSTD
316-322	AHALFTR	814.445	TSTD	TSTD
476-482	HNVLNAK	794.44	TSTD	TSTD
578-585	QGDAGSSR	776.341	TSTD	TSTD
539-544	ADWQVR	773.382	TSTD	TSTD
567-572	IDNQLR	757.408	TSTD	TSTD
626-632	AIANAQR	742.409	TSTD	TSTD
658-663	AIYSQR	736.387	TSTD	TSTD
787-792	QGIHLR	722.419	TSTD	TSTD
98-103	CIAEMR	721.325	TSTD	TSTD
597-602	IFASDR	707.36	TSTD	TSTD
603-608	VSGMMR	679.314	TSTD	TSTD
638-642	NFDIR	663.334	TSTD	TSTD
681-685	EDVFK	636.312	TSTD	TSTD
846-850	MEAER	634.274	TSTD	TSTD
47-51	TAEFR	622.308	TSTD	TSTD
78-82	VFGMR	608.31	TSTD	TSTD
895-899	QCHGR	599.26	TSTD	TSTD
343-347	TMQGR	591.28	TSTD	TSTD
801-804	QEYK	566.27	TSTD	TSTD
793-797	GYAQK	565.286	TSTD	TSTD
9-13	VFGSR	564.302	TSTD	TSTD
761-764	HFEK	559.275	TSTD	TSTD
383-386	LYEK	551.295	TSTD	TSTD
562-565	HESR	527.245	TSTD	TSTD
1-4	MLIK	503.314	TSTD	TSTD
829-832	VQVR	500.307	TSTD	TSTD
*ND, Not detected; TSTD, Too small to detect by MALDI-TOF
